# Supplementary material for: The metal-directed self-assembly of three-dimensional porphyrin arrays
Source: Royal Society of Chemistry journal article supplement (doi:10.1039/b002562n), 2000-01-01
Supplement: b002562n.doc [file b002562n.doc]

**The metal-directed self-assembly of three-dimensional porphyrin arrays**

Kelly Chichak and Neil R. Branda*

**Supporting Information**

**Experimental**

**General.** All solvents (Caledon) were used as received. Solvents for NMR analysis (Cambridge Isotope Laboratories) were used as received. All reagents and starting materials were purchased from Aldrich. 4,4’-di(4’’-pyridyl)-2,2’-bipyridine, **1**1 was prepared as described in the literature.

1H NMR characterizations were performed on a Varian Inova-300 instrument, working at 299.96 MHz. Chemical shifts (**) are reported in parts per million relative to tetramethylsilane using the residual solvent peak as a reference standard. Coupling constants (*J*) are reported in Hertz. FT-IR measurements were performed using a Nicolet Magna-IR750. UV-Vis measurements were performed using a Pharmacia Biotech Ultraspec 3000 spectrophotometer.

**Synthesis of core 2:** A solution of ligand **1** (120 mg, 0.387 mmol) and RuCl3•xH2O (28 mg, 0.116 mmol) in ethylene glycol (5 mL) was heated at reflux for 3 hours. The reaction mixture was cooled to room temperature, diluted with water (3 mL) and treated with an excess of a methanolic solution of NH4PF6. The resulting dark red precipitate was collected by filtration on a Celite pad and washed with water. The solid product was removed from the Celite by dissolving in acetonitrile and chromatographed through silica gel using acetonitrile-saturated aqueous potassium nitrate-water (7:1:2) as eluent. The red-orange band was collected and concentrated until a precipitate formed. The precipitate was collected by filtration, redissolved in acetonitrile and treated with excess NH4PF6. The addition of ether to this solution afforded the product as a red solid, which was collected by filtration and dried under vacuum. Yield 30 mg (20%): 1H NMR (300 MHz, [D6]acetone, 22°C): ** = 9.53 (d, *J* = 1.5 Hz, 6H), 9.02 (dd, *J* = 1.5, 6.6 Hz, 12H), 8.46 (d, *J* = 6.0 Hz, 6H), 8.24 (dd, *J* = 1.5, 6.6 Hz, 12H), 8.07 (dd, *J* = 1.5, 6.0 Hz, 6H); MS (ES+): *m/z* = 516 [*M* –(2PF6)]2+.

**Synthesis of arrays 2(TTP)** and **2(OEP):** A solution of **2** (1.51 x 10-3 mM) in acetone was treated with 6.1-6.3 molar equivalents of [Ru(TTP)(CO)(EtOH)] or [Ru(OEP)(CO)(EtOH)] and stirred with gentle heating (about 40°C) for 2 hours. The complexes were precipitated by the addition of pentane and collected by filtration.

**2(TTP):** Yield 9.0 mg (98%): 1H NMR (300 MHz, [D6]acetone, 22°C): ** = 8.62 (s, 48H), 8.13 (dd, *J* = 2.1, 7.8 Hz, 24H), 7.75 (dd, *J* = 1.8, 7.8 Hz, 24H), 7.71 (d, *J* = 8.5 Hz, 24H), 7.45 (d, *J* = 8.1 Hz, 24H), 7.27 (d, *J* = 1.8 Hz, 6H), 6.53 (d, *J* = 6.3 Hz, 6H), 6.02 (dd, *J* = 1.8, 6.0 Hz, 6H), 5.16 (d, *J* = 6.9 Hz, 12H), 2.73 (s, 72H), 1.37 (d, *J* = 6.9 Hz, 12H); 1H NMR (300 MHz, [D2]methylene chloride, 22°C): ** = 8.59 (s, 48H), 8.09 (dd, *J* = 2.1, 7.8 Hz, 24H), 7.74 (dd, *J* = 1.8, 7.8 Hz, 24H), 7.61 (d, *J* = 8.5 Hz, 24H), 7.37 (d, *J* = 8.1 Hz, 24H), 6.42 (d, *J* = 1.8, 6H), 5.91 (d, *J* = 6.3 Hz, 6H), 5.81 (dd, *J* = 1.8 Hz, 6.0 Hz, 6H), 4.97 (dd, *J* = 1.5, 6.9 Hz, 12H), 2.71 (s, 72H), 1.35 (dd, *J* = 1.5, 6.9 Hz, 12H); MS (ES+): *m/z* = 2909 [*M* –(2PF6)]2+; UV-Vis (methylene chloride) max (log /dm3 mol-1 cm-1) 411 (6.10), 533 (5.03), 567 (4.56); IR(scope)  (cm-1) = 1967 (CO).

**2(OEP):** Yield 7.2 mg (97%): 1H NMR (300 MHz, [D6]acetone, 22°C): ** = 9.93 (s, 24H), 6.94 (s, 6H), 6.15 (d, *J* = 5.7 Hz, 6H), 5.73 (d, *J* = 6.0 Hz, 6H), 4.77 (d, *J* = 6.6 Hz, 12H), 4.16 (b, 96H), 1.93 (t, 144H), 0.73 (d, *J* = 6.0 Hz, 12H); 1H NMR (300 MHz, [D2] methylene chloride, 22°C): ** = 9.93 (s, 24H), 6.98 (s, 6H), 6.53 (d, *J* = 5.7 Hz, 6H), 5.76 (dd, *J* = 1.8, 6.3 Hz, 6H), 4.81 (d, *J* = 6.9 Hz, 12H), 4.16 (b, 96H), 1.93 (t, 144H), 0.73 (d, *J* = 6.0 Hz, 12H); MS (ES+): *m/z* = 2503 [*M* –(2PF6)]2+; UV-Vis (methylene chloride) max (log /dm3 mol-1 cm-1) 394 (5.73), 518 (4.68), 548 (4.80); IR(scope)  (cm-1) = 1942 (CO).

**Characterization of array 3(TTP):** 1H NMR (300 MHz, [D6]acetone/[D2]methylene chloride 22°C): ** = 8.60 (s, 48H), 8.08 (dd, *J* = 2.1, 7.8 Hz, 24H), 7.72 (dd, *J* = 1.8, 7.8 Hz, 24H), 7.62 (d, *J* = 8.5 Hz, 24H), 7.40 (d, *J* = 8.1 Hz, 24H), 7.13 (d, *J* = 1.8, 6H), 5.98 (d, *J* = 6.3 Hz, 6H), 5.89 (dd, *J* = 1.8, 6.0 Hz, 6H), 5.08 (dd, *J* = 1.5, 6.9 Hz, 12H), 2.71 (s, 72H), 1.33 (dd, *J* = 1.5, 6.9 Hz, 12H); 1H NMR (300 MHz, [D2]methylene chloride, 22°C): ** = 8.59 (s, 48H), 8.09 (dd, *J* = 2.1, 7.8 Hz, 24H), 7.74 (dd, *J* = 1.8, 7.8 Hz, 24H), 7.61 (d, *J* = 8.5 Hz, 24H), 7.37 (d, *J* = 8.1 Hz, 24H), 6.42 (d, *J* = 1.8, 6H), 5.91 (d, *J* = 6.3 Hz, 6H), 5.81 (dd, *J* = 1.8, 6.0 Hz, 6H), 4.97 (dd, *J* = 1.5, 6.9 Hz, 12H), 2.71 (s, 72H), 1.35 (dd, *J* = 1.5, 6.9 Hz, 12H); MS (ES+): *m/z* = 2888 [*M* –(2PF6)]2+; UV-Vis (methylene chloride) max (log /dm3 mol-1 cm-1) 411 (5.96), 583 (4.95), 567 (4.58); IR(scope)  (cm-1) = 1948 (CO).

1 R. J. Morgan and A. D. Baker, *J. Org. Chem.*, 1990, **55**, 1986.
